1 **Main Title: Acceptability of Breast Milk Donor Banking: A qualitative study among**  
2 **Health Workers in Greater Accra Regional Hospital, Ghana**

3 **Short Title: Health workers acceptability of breast milk donor banking**

4

5 <sup>1</sup>Fred Kafui Tende, <sup>1</sup>Adanna Uloaku Nwameme <sup>1</sup>Philip Teg-Nefaah Tabong\*

6 <sup>1</sup>Department of Social and Behavioural Sciences, School of Public Health, Box LG 13,

7 College of Health Sciences, University of Ghana, Legon

8 \*Corresponding author: [ptabong@ug.edu.gh](mailto:ptabong@ug.edu.gh)

9

10

11

12

13

14

15

16

17

18

19

20

21

22

23

24

25

NOTE: This preprint reports new research that has not been certified by peer review and should not be used to guide clinical practice.

26 **Abstract**

27 Despite the compelling evidence demonstrating the immediate and long-term health  
28 advantages of prompt breastfeeding beginning, not all newborns are breastfed exclusively for  
29 a variety of reasons. As a result, the World Health Organization has made new  
30 recommendations for the adoption of breastmilk donor banks to make sure that children  
31 receive breastmilk when mothers are unable to produce it. In order to better understand how  
32 health professionals at the Greater Accra Regional Hospital, who would be leading the charge  
33 in putting this policy into practice, perceive and accept the practice of storing breastmilk, this  
34 study was conducted. At the Greater Accra Regional Hospital, 18 healthcare professionals  
35 were chosen using maximum variation purposive sampling procedures. They were made up  
36 of eleven midwives, a medical officer, six nurses, and two nutritionists and all participants  
37 were interviewed face to face using a semi structured interview guide. Data was transcribed  
38 verbatim and was analyzed using thematic analysis. Participants in the study admitted that  
39 they would be open to using or contributing to a bank of breastmilk. Participants also said  
40 that if safety precautions are taken, they would urge their customers to give breastmilk and  
41 recommend breastmilk from a breastmilk bank to them when the situation calls for it. Health  
42 professionals recommended that education be provided prior to the installation of breast milk  
43 donor banking to lessen or eliminate any misconceptions people may have about it. The  
44 concept of breastmilk donor banking was fairly accepted among health workers.  
45 Misconceptions about the safety of breast milk was the main concern. The results emphasize  
46 the necessity of greater stakeholder engagement and education prior to the implementation of  
47 this policy in order to boost acceptance and uptake.

48

49

50

## 51 **Introduction**

52

53 Breast milk is the safest and most protective food for infants, and it's also the ideal choice for  
54 feeding premature and ill babies. For the first six months of life, breastmilk meets all  
55 nutritional needs [1]. Also, it shields the youngster from malnutrition and promotes healthy  
56 growth. Non-nutrient components of breast milk include immunoglobulins and lactoferrin,  
57 which can help in intestinal maturation and adaptation as well as protection from viral and  
58 inflammatory illnesses [2]. The World Health Organization (WHO) advises only six months  
59 of exclusive breastfeeding. Up until the age of two, supplemental feeding is advised, and after  
60 that, it can continue for as long as the mother and child see fit [3]. Exclusive breastfeeding  
61 (EBF) is recommended to reduce infant mortality and improve health and cognitive  
62 development by preventing infection [4].

63

64 Only 42% of the 135 million babies born each year throughout the world receive only breast  
65 milk for the first hour, 38% of moms breastfeed exclusively for the first six months, and 58%  
66 of mothers exclusively breastfeed their kids until they are two years old [1]. Despite the fact  
67 that 98% of Ghanaian women claim to have breastfed their children at some time, infant  
68 feeding methods like exclusive breastfeeding and sufficient supplemental feeding are not  
69 frequently used [5]. USAID is working in Ghana to promote newborn and young child eating,  
70 including nursing practices, as one of many initiatives to lower the high rates of children who  
71 are too small for their age or stunted in the nation [6]. Historically and throughout cultures,  
72 informal breastfeeding sharing has been reported across cultures [2]. Peer-to-peer milk  
73 sharing is frequently done by mothers within their social circle [7]. Peer-to-peer milk sharing  
74 has the intention of providing human milk to infants whose parents are unable to provide any  
75 or enough milk, but this unregulated practice carries some risk because the milks are not

76 subjected to any serological testing or screening, which means that diseases like Hepatitis B,  
77 syphilis, HIV, and other diseases may not be detected [8]. Human milk is the best food for all  
78 newborn humans. Nonetheless, there are several situations where the mother is unable or  
79 unwilling to breastfeed. A replacement is necessary in these circumstances [9].

80

81 If possible and safe, WHO advises replacement feeding when breastfeeding, especially  
82 exclusive breastfeeding, may be hampered. Options for bridging the gap include donor breast  
83 milk from a human milk bank and formula feeding. Breast milk banks have been proposed as  
84 a means of preserving and donating breast milk to help feed neonates whose mothers are  
85 unable to breastfeed owing to several reasons [10]. At least 800,000 children worldwide  
86 receive donor human milk each year through breastmilk banking, according to a report by a  
87 virtual communication network of leaders in global milk banking from the year 2020 [11].  
88 There are currently 248 Human Milk Banks spread across 26 European countries, according  
89 to the European Milk Bank Association (EMBA) [12]. However, the implementation of  
90 breastmilk banking has been slow in Africa [8].

91

92 According to estimates, only 42% of breastfeeding moms in Ghana continue to do so for the  
93 whole 20–23 months, whereas 43% of women exclusively breastfeed for 0–5 months. Even  
94 though the Ghanaian government has put rules in place to encourage exclusive breastfeeding,  
95 there are still significant obstacles standing in the way of achieving the best possible  
96 outcomes for newborn health and wellbeing, necessitating the possibility of breast milk  
97 banking. In a previous study, 8% of mothers admitted to ever giving breastmilk to another  
98 mother without having the milk screened [13]. As a result, it's critical to investigate the WHO  
99 suggestion of donor banking for breastmilk, which offers the chance for the milk to be

100 checked before use. Nonetheless, the support of important stakeholders like health workers is  
101 necessary for the implementation of this strategy. Hence, this study was conducted to explore  
102 breast milk donor bank acceptability among health workers in Greater Accra Region of  
103 Ghana.

## 104 **Methods and Material**

105

### 106 **Ethical approval**

107 The Ghana Health Service Ethics Review Committee (GHS-ERC 030/09/22) granted ethical  
108 approval for the study. Also, permission from the Greater Accra Regional Hospital's  
109 administration was sought in order to carry out the study. An informed consent document was  
110 signed by each study subject.

### 111 **Study design**

112 The study relied on a narrative study design [14]. The research was designed to allow  
113 participants to express their understandings and perceptions of the meaning and experiences  
114 related to the breast milk bank because individuals and groups of people perceive a  
115 phenomenon differently [15]. The data for the study was collected among health workers at  
116 Greater Accra Regional Hospital. The hospital renders antenatal and delivery services to  
117 pregnant women and is a secondary level government hospital supporting the leading referral  
118 centre in Korle-Bu Teaching Hospital, Accra, thereby positioning it favourably as the study  
119 setting.

### 120 **Theoretical underpinnings of study**

121 The acceptability framework created by Sekhon and colleagues [16] was used in the  
122 investigation. While planning, carrying out, and putting into practice wellness interventions,  
123 acceptance is a crucial factor to consider. Based on predicted or actual cognitive and emotional

124 responses to the intervention, it is a complex term that reflects the degree to which those  
125 delivering or receiving healthcare interventions feel them to be acceptable [16]. The seven  
126 component constructs that make up the theoretical framework of acceptability (TFA) are  
127 affective attitude, burden, ethicality, intervention coherence, opportunity cost, perceived  
128 effectiveness, and self efficacy [16].

129

130 Affective attitude examines how a person feels about a particular intervention. The apparent  
131 effort needed to take part in an intervention is what is meant by the load. The degree to which  
132 the intervention fits well with the person's set of values is what constitutes ethicality. The  
133 degree to which participants comprehend the intervention and its mechanism of action is  
134 measured by its coherence. Opportunity costs examine whether gains, earnings, or values will  
135 be sacrificed while relying on an intervention directly or indirectly. The degree to which an  
136 intervention is considered as likely to fulfill its goals is covered by perceived effectiveness, and  
137 the participants' self-efficacy is examined by perceived effectiveness and self-efficacy,  
138 respectively [16]. These seven principles were combined in determining acceptability of  
139 breastmilk donor banking.

140

### 141 **Study population and sampling**

142 Health professionals from Accra's Greater Accra Regional Hospital made up the study's  
143 target population. In this investigation, maximum variation purposive sampling was used. To  
144 determine which hospital departments are involved in infant feeding, the researchers got in  
145 touch with the medical director of the facility. Based on this, the departments were  
146 approached to request participant nominations for projects that have a direct bearing on  
147 breastfeeding infants. A total of 18 health professionals, including 11 midwives, 4 nurses, 2

148 nutritionists, and a medical doctor, participated in the study on the basis of data saturation.  
149 Before collecting data, consent forms were distributed to health personnel who wished to  
150 participate in the study.

151

## 152 **Data collection tool and procedure**

153 An interview guide was used to conduct the in-depth interviews. The interview concentrated  
154 on the understanding and attitudes of health professionals on the appropriateness of  
155 breastmilk donor banking. One of the main issues was respondents' inclination or  
156 unwillingness to recommend families and potential families to give and/or use donated  
157 breastmilk, or to donate and/or use donated breastmilk to nourish their needed infants. Also  
158 requested was permission to record the interviews. Following each interview, participants'  
159 sociodemographic and professional information was collected on a separate form. As a  
160 method of participant validation, the interviewer outlined the main points after the interview  
161 [17]. An interview session takes 45 to 60 minutes to complete.

## 162 **Data analysis**

163 Using version 13 of QSR NVivo, data was examined. For this study, a thematic approach was  
164 used. The taped interviews were completely transcribed in order to guarantee credibility and  
165 objective results. The data was independently coded, and the transcript was cross-checked.  
166 Coding results were examined, and codes were examined for consistency, to assure intercoder  
167 concordance [18]. Themes and new issues were established when the codes were jointly  
168 reviewed. Themes and topics from the interview guide were initially used to analyze the data.  
169 An inductive technique was used to discover additional themes, sub-themes, and patterns in  
170 the data [19]. Finally, quotes from the study subjects were used to support the points made.

171 **RESULTS**

172 **Socio demographics of participants**

173 The sociodemographic details of the participants are shown in Table 1. Of the eighteen (18)  
174 volunteers gathered for the study, eleven (11) were midwives. There were five nurses, two  
175 nutritionists, and one medical doctor. Two (2) men and sixteen (16) women who responded to  
176 the survey were the respondents. The responders' average age was close to thirty (30) years.  
177 A postgraduate degree was the greatest level of education earned by the respondents, and a  
178 diploma was the lowest. Just two (2) of the respondents were Muslims but the majority, were  
179 Christians.

180 **Table 1: Socio-demographic characteristics of study participants**

| <b>Characteristics</b>                  | <b>Number</b> | <b>Percentage (%)</b> |
|-----------------------------------------|---------------|-----------------------|
| <b><i>Gender Of Respondents</i></b>     |               |                       |
| Male                                    | 16            | 88.89                 |
| Female                                  | 2             | 11.11                 |
| <b><i>Profession Of Respondents</i></b> |               |                       |
| Medical Officer                         | 1             | 5.56                  |
| Midwife                                 | 11            | 61.11                 |
| Nurse                                   | 4             | 22.22                 |
| Nutritionist                            | 2             | 11.11                 |
| <b><i>Marital Status</i></b>            |               |                       |
| Married                                 | 8             | 44.44                 |
| Never Married                           | 10            | 55.56                 |
| <b>Religion</b>                         |               |                       |
| Christian                               | 16            | 88.89                 |
| Islam                                   | 2             | 11.11                 |
| <b>Educational Attainment</b>           |               |                       |
| Diploma                                 | 5             | 27.78                 |
| Degree                                  | 12            | 66.67                 |
| Postgraduate                            | 1             | 5.56                  |

181

182 **Themes from Data**

183 A summary of the global, main and subthemes that emerged from the data is provided in

184 Table 2.

185 **Table 2: Main themes and subthemes**

| Global themes                                                                      | Main themes                                                                         | Sub themes                                                                                                                                                                                       |
|------------------------------------------------------------------------------------|-------------------------------------------------------------------------------------|--------------------------------------------------------------------------------------------------------------------------------------------------------------------------------------------------|
| Knowledge about breast milk donor banking                                          | Knowledge                                                                           | <ul style="list-style-type: none"> <li>• Knowledge on breastmilk donor banking</li> </ul>                                                                                                        |
| Perception of Health workers regarding breastfeeding and breast milk donor banking | Safety of breastmilk                                                                | <ul style="list-style-type: none"> <li>• Fear of transmission of diseases such as HIV</li> <li>• Fear of transmitting hereditary traits to infants</li> </ul>                                    |
|                                                                                    | Challenges and concern                                                              | <ul style="list-style-type: none"> <li>• Low patronage</li> <li>• Reluctance of mothers to donate</li> <li>• Storage of breastmilk</li> <li>• Risk of infections</li> </ul>                      |
|                                                                                    | Significance of breastmilk                                                          | <ul style="list-style-type: none"> <li>• Breast milk bank is beneficial</li> <li>• Reduction of infant mortality</li> <li>• Protection against diseases</li> </ul>                               |
|                                                                                    | Cultural, ethics and religious considerations                                       | <ul style="list-style-type: none"> <li>• Activities of some religious and traditional leaders</li> <li>• Regulations of certain Christian churches</li> <li>• The practice is ethical</li> </ul> |
| Acceptability of breastmilk donor banking among health workers                     | The use of infant formulas against breastmilk from a breastmilk bank (Pre NAN etc.) | <ul style="list-style-type: none"> <li>• Cost</li> <li>• Preparation for use</li> <li>• Risks for infants</li> <li>• Health benefits</li> </ul>                                                  |
|                                                                                    | Affective Attitude                                                                  | <ul style="list-style-type: none"> <li>• Excitement</li> <li>• Happy</li> </ul>                                                                                                                  |
|                                                                                    | Opportunity cost                                                                    | <ul style="list-style-type: none"> <li>• Loss of bond, attachment</li> </ul>                                                                                                                     |
|                                                                                    | Intervention coherence                                                              | <ul style="list-style-type: none"> <li>• Participants' understanding of its operation</li> </ul>                                                                                                 |
| Perceived effectiveness                                                            | Things that need to be                                                              | <ul style="list-style-type: none"> <li>• Willingness to donate/ reluctance to donate breastmilk</li> <li>• Willingness to use donated donor breastmilk for feeding their infant</li> </ul>       |
|                                                                                    |                                                                                     | <ul style="list-style-type: none"> <li>• Education</li> </ul>                                                                                                                                    |

|  |                                    |                                                                                                          |
|--|------------------------------------|----------------------------------------------------------------------------------------------------------|
|  | put in place before implementation | <ul style="list-style-type: none"><li>• Provision of qualified personnel</li><li>• Motivations</li></ul> |
|--|------------------------------------|----------------------------------------------------------------------------------------------------------|

186

187 **Knowledge on breastmilk donor banking**

188 Breastmilk donor banking is described by healthcare professionals as the storing of expressed  
189 breastmilk for use in feeding other infants. According to a midwife's definition, it has also  
190 been used to feed infants whose moms are unable to breastfeed due to medical issues. While  
191 some healthcare professionals appeared to be unaware of the logic behind breastmilk donor  
192 banking, others were previously familiar with it. These health professionals said that their  
193 primary sources of information on breastmilk banks were the school, their peers, and the  
194 internet. As supported by these quotations, some definitions given by healthcare professionals  
195 regarding the banking of breastmilk were as follows:

196 *“I learnt it’s a bank just like the blood bank, where breastmilk is donated by various*  
197 *women, collected, screened (I mean it is passed through various investigations),*  
198 *packaged and stored under certain temperature and made readily available for*  
199 *mothers whom under certain conditions cannot breastfeed their babies.” (Midwife 1)*

200 *“It is the storing of donated breastmilk from mothers to feed children who have no*  
201 *opportunity to get breastmilk from their biological mothers.” (Midwife 2)*

202 One midwife added that she learned about it while the COVID-19 outbreak was going on.

203 The following quotation demonstrates this idea:

204 *“To be honest I never knew of such a thing till the COVID-19 time when I learnt in the*  
205 *West, people were donating their breastmilk due to the shortage of formular feeds,*  
206 *that was when I knew you can even do such a thing.” (Midwife, participant 7)*

207 In addition to some medical professionals declaring unequivocally that this is the first time  
208 they had heard of it, one midwife made a comparison to other methods of breastfeeding an  
209 infant, particularly when they are ill. The following passage supports my point:

210 *“No, I don’t know such a thing like that. What I know is like when your child is being*  
211 *admitted to the ICU (Intensive Care Unit), sometimes the mother can’t go there and*  
212 *breastfeed so sometimes, they withdraw the milk into a container so that we feed the*  
213 *babies with those milk.” (Midwife, 5)*

214

## 215 **Perception of health workers regarding breastmilk donor banking**

216

### 217 **Benefits of breastmilk donor banking**

218 After the notion was conveyed to health personnel, they agreed that the introduction of  
219 breastmilk donor banking is a very good idea. Health professionals acknowledged that not  
220 every newborn has the opportunity to get breastmilk due to circumstances making it difficult  
221 for the mother to do so, and that the introduction of breastmilk banking will help solve this  
222 issue. The quotes that follow emphasize these viewpoints:

223

224 *“I think it’s a good idea because as I said, sometimes when there is loss of life it*  
225 *becomes very difficult for anyone to just get up and breastfeed someone else’s child*  
226 *but if something like this is at play, I feel it’s going to be a very good idea and a very*  
227 *good source for the other babies who are lacking in that aspect to also benefit from*  
228 *the benefits of breastmilk.” (Midwife, 3)*

229 *“It will benefit the baby and the mother at large. The baby will get all the nutrients*  
230 *required from breastmilk, it will increase the child’s mental and general development*  
231 *and childhood disease and infections would be prevented.” (Midwife, 12)*

232 There was widespread consensus that breast milk banks were beneficial since they will  
233 reduce premature mortality, according to the medical community. In light of the advantages,  
234 health practitioners generally had positive opinions about breastmilk banks. The quotes below  
235 serve to emphasize this:

236

237 *“I will say it will reduce infant mortality of premature babies whose mothers can’t*  
238 *breastfeed or express their milk for use to feed the baby. It will also benefit orphans.*  
239 *It will benefit babies who wouldn’t have mothers’ milk to feed on they will also have*  
240 *the chance to be exclusively breastfed, mothers wouldn’t have to worry about not*  
241 *been able to produce enough breastmilk for their kids, HIV infected mothers wouldn’t*  
242 *have the problem to think about how they are going to breastfeed their infant.”*

243 (Nurse, 3)

244 *“... It would reduce infant mortality because the introduction to breastmilk in an*  
245 *infant life will protect the child from minor illnesses and will boost the immune system*  
246 *of the child. Breastmilk is the best food for a newly born baby.”* (Midwife, 14)

247 The practice of exclusive breastfeeding was a concern for health professionals, particularly  
248 those who were mothers, due to their line of work. They said that the necessary six months of  
249 exclusive breastfeeding could not be practiced during the three months of maternity leave and  
250 that the installation of a breastmilk bank would enable them to breastfeed their children  
251 entirely. The quotes that follow further explain this idea:

252 *“...our maternity leave is not enough and sometimes expressing the milk too is time*  
253 *consuming for the mothers so if you are lazy or not dedicated, you cannot breastfeed*  
254 *so breastmilk bank will save us from all these...”* (Midwife, 1)

255 *“I did not do exclusive breastfeeding for the first two children, I did it for the last one.*  
256 *The first two because the annual leave is almost two months, and the maternity leave*  
257 *is three months, so I couldn’t do it.” (Nurse, 2)*

258 *“Sometimes the time isn’t enough for us to breastfeed exclusively; even when it comes*  
259 *to expressing the breastmilk to feed your child, it also takes time so if you are not*  
260 *determined to breastfeed your child, then you might end up feeding your baby with the*  
261 *infant formulas which is also expensive and if not prepared well can harm your*  
262 *child.” (Nurse, 4)*

263 Donor breastmilk banking was regarded as a moral practice. Health professionals believed  
264 that the practice was not novel and that it was appropriate for a community in Ghana. Health  
265 professionals noted that in the past, close relatives would wet nurse infants when the original  
266 mother was unable to do so. Health professionals emphasized that the introduction of  
267 breastmilk donor banking was an advanced form of wet nursing and that the practice had  
268 been discontinued owing to the risk of spreading diseases or infections. The quotes that  
269 follow demonstrate these ideas:

270

271 *“I would say it’s not against our moral principle. It’s a remedy to a problem so I*  
272 *don’t see anything wrong with it.” (Nurse, 1)*

273 *“It’s already out there just that it’s among families. My mother told me good stories*  
274 *about it; like you give birth, and you are no more, your mother or anyone that has*  
275 *given birth before can breast feed your child. You just need to stimulate the breast*  
276 *and the milk will come. This is just a means of formalizing it. If my sister gives birth*  
277 *and God forbids, she is no more, ah I will feed the child. People are doing it, I can*  
278 *assure you.” (Nurse, 3)*

279           *“In the olden days when someone delivers and dies or maybe is sick and there is a*  
280           *relative or a friend who has delivered, the person can breastfeed the child; but now*  
281           *fear of infections and all that, like STI....”* (Nurse 2)

282   Christian and Muslim health professionals who were asked if their faith would prevent them  
283   from accepting breastmilk donor banks gave good responses. However, several medical  
284   professionals expressed worry that some Christian churches, whose names have been  
285   omitted, would not endorse it even though they are in favor. The following accounts lend  
286   credence to these opinions:

287  
288           *“Religiously I think maybe the same group of people who have problem with the*  
289           *blood bank is the same people who will have issues with the breastmilk donor banking*  
290           *but personally my religion will not frown on it.”* (Nurse 2, Christian)

291           *“... my religion will tell me that anything that will benefit you it doesn't prevent it so*  
292           *religiously my religion wouldn't prevent me.”* (Nurse 3, Muslim)

293           *“I don't think I would have any problem with that personally and religiously as well*  
294           *because it's something that's going to benefit the child and not going to harm the*  
295           *child so religiously, I don't think there should be a problem with that.”* (Midwife 3,  
296   Muslim)

### 297   **Risk of infections from contaminated breastmilk**

298   Despite the fact that the health professionals thought the intervention was effective, some  
299   people believed that given a baby's immunization, it wasn't safe to use it to feed them. Infant  
300   feeding safety issues as well as the possibility that children could acquire genetic or inherited  
301   features from unknowing donors, including the danger of HIV infection, were highlighted.  
302   The quotes below demonstrate this position:

303

304 *“Genetically I don’t know what is within that breastmilk production, you know, there*  
305 *might be cancer cells in that breastmilk that I am feeding because it’s been produced*  
306 *by another mother and you know everything is made up of cells so it is cells that are*  
307 *generating all these things, so if it’s generating something like that, I don’t know*  
308 *whether there are traces of cancer cells in that person’s family or something like a*  
309 *genetic disease or something. It’s been screened o, but deep down it’s not 100%*  
310 *safe.” (Midwife 10)*

311 *“It is a good intervention I will say but where I am reluctant or where I am holding*  
312 *back is, will it be safe? As in will it be hygienic and free from diseases like HIV? Are*  
313 *we having the resources to operate it in Ghana? It will be safe when it is screened for*  
314 *infections so that it doesn’t cause harm to the infant.” (Nurse 4)*

315 Health professionals emphasized that there would be no cause for concern if only the donors  
316 and breastmilk were screened for illnesses to make it safe. The narratives that follow support  
317 this assertion:

318 *“So far as they will be screened for its safety, then it is good because there are people*  
319 *who are not healthy to do so but so far as it would be screened then it is a good*  
320 *initiative because breastmilk contains essential nutrients.” (Midwife, 12)*

321 *“I was doubting because I don’t think it would be safe for me to come and take*  
322 *breastmilk to feed my child in case of anything but if it undergoes processes and if all*  
323 *other things concerning its safety can be taken care of then there is nothing wrong*  
324 *about it.” (Midwife, 9)*

325 A medical official who agreed that breastmilk should be checked for safety said that health  
326 professionals are also susceptible to making mistakes, such as wrongly declaring an HIV

327 positive donor negative, which might have a significant detrimental impact on an unborn  
328 child. The following assertion demonstrates this:

329 *“Fine it will go through some processes, mothers would be screened and all that but*  
330 *in the medical field too we tend to be negligent sometimes. You might mistake*  
331 *somebody’s report for another’s; let’s say if a mother is retro positive and then the*  
332 *person goes to donate milk and we mix the report with another person’s own thinking*  
333 *the mother is negative, what have you done to the baby? You have automatically*  
334 *infected the baby with HIV so when it comes to the medical side it is a no no. I also*  
335 *think it is not really necessary in this part of the world because we do well when it*  
336 *comes to breastfeeding.” (Medical Officer 1)*

### 337 **Preference for donor breastmilk versus artificial formula**

338 Health professionals emphasized that in terms of health benefits, artificial formulas fall well  
339 short of breastmilk. Respondents claimed that poor preparation of formula had a detrimental  
340 impact on newborns. Health professionals believed that, despite the cost of saved breastmilk,  
341 it wouldn't be as expensive as infant formula. These respondents' opinions are illustrated by  
342 the quotes that follow:

343 *“Compared to formula feeds, breastmilk has a lot more nutrients than formula feeds.*  
344 *The feeds have some side effects of formula feedings including allergy and*  
345 *constipation. The cost of artificial formula is high. Even though donor milk will cost*  
346 *money, I don't think it will cost much more than artificial formulas.” (Midwife, 12)*

347 *“... breastmilk is highly nutritious than infant formulas; what role breastmilk plays*  
348 *cannot be compared to artificial formulas. It contains antibodies and other nutrients*  
349 *that help fight against diseases so health wise the breastmilk will be better in terms of*  
350 *this aspect and that’s what we want to achieve.” (Midwife, 7)*

351            *“With the artificial formulas, I don’t think it is the best because it does not contain the*  
352            *necessary nutrients as compared to the breastmilk so with the artificial formulas, I*  
353            *myself I don’t even like it when babies are giving artificial formulas.”* (Midwife, 10)

354    There were two perspectives on how convenient donor breastmilk or baby formulae were.  
355    Regarding saving time, several of the responders thought donor breastmilk was more  
356    practical because it didn't require preparation time, unlike artificial formulas that needed  
357    boiling water and clean bowls and spoons to avoid contaminating the feed. Some experts took  
358    accessibility into account when deciding on the convenience. Formula feeds were thought to  
359    be more approachable in that regard. Breastmilk from a donor bank is more practical when  
360    decisions are made based on potential health advantages. The following narratives serve as  
361    examples of these viewpoints:

362  
363            *“The breast milk or the breastmilk bank is convenient because you are not going to*  
364            *prepare it, you are just going to take and give; but with the artificial you are now*  
365            *going to prepare it. You need to look at the instructions, put water (boiled water hot*  
366            *cold, you know) and you either add more milk, less water or vice versa. But with the*  
367            *breast milk you just take it and you are giving it to the baby.”* (Nurse 3)

368            *“With the convenience, the formula feeds will be convenient because it can be found*  
369            *in most shops to buy but with the donor breastmilk you will have to go to a breastmilk*  
370            *bank before you can get access to it.”* (Nurse 2)

371            *“There is no doubt that breastmilk is the best and it cannot be compared to formulas*  
372            *irrespective of its cost and convenience but as Ghanaians we will prefer something*  
373            *accessible and less expensive. So if the donor breastmilk is in existence and it’s also*

374 *going for a cost, mothers or families would prefer the formulas because for the*  
375 *formulas it's all over stores and you can get it anytime.” (Medical Officer 1)*

376 **Challenges health workers anticipate with regards to breast milk donor banking**

377 The primary difficulty that health experts anticipated was the safety of donor breastmilk to  
378 feed newborns. They believed that people would continue to wonder if donated human milk  
379 would be safe to give to infants. Also, they expressed their uncertainty as to whether moms  
380 would feel the use of stored breastmilk to be suitable. The following statements provide  
381 examples of these viewpoints:

382 *“People will be concerned about the safety of the breastmilk; medically, had the*  
383 *breastmilk gone through screening? Is it safe? Would the baby get some form of,*  
384 *probably condition or diseases, should in case the donor have those conditions, like*  
385 *would there be some form of transfers that will affects the child's health?”*

386 (Nutritionist, 1)

387 *“I think the concern people might raise more is you not knowing the person the*  
388 *breastmilk is from, people not being sure. You said you are screening, are you sure*  
389 *you screened it? And then the conditions, the hygienic condition; I think these are the*  
390 *things people would raise concerns about.” (Midwife, 2)*

391 *“People will also be concerned about the safety of it whether it has really undergone*  
392 *some level of screening to make it safe. So, if they are 100% sure that the breastmilk*  
393 *does not contain any infections and that when given to my baby it wouldn't harm him*  
394 *or her.” (Midwife, 10)*

395 Health professionals also expected that mothers could be reluctant to give breastmilk to a  
396 bank, which might lead to shortages and undermine the bank's success. As we don't have

397 enough competent workers, some health professionals expressed concern that its safety would  
398 be at risk. The quotes that follow emphasize these ideas:

399 *“The operation of donor milk banking will depend on mothers donating breastmilk to*  
400 *the bank so if in future mothers feel reluctant to donate, the operation wouldn’t*  
401 *achieve its purpose.”* (Midwife 8)

402 *“I feel it would be hard to get donors because this is not the need now in our*  
403 *hospitals and maybe certain cultural beliefs will also hinder people from patronizing*  
404 *it. I also feel its safety would be compromised because we don’t have the personnel, I*  
405 *mean the technical know-how to handle a breastmilk bank. Even when it’s been*  
406 *operated, the bond between mother and child might be lost.”* (Medical Officer, 1)

407 *“There can be shortage of breastmilk when it becomes rooted, and everybody is*  
408 *purchasing, and we are not getting people to replace the breast milk.”* (Midwife,1)

409

410 Some medical professionals were also concerned about how breastmilk is stored and how  
411 long it may be kept in the breast bank before becoming bad. The following quotations support  
412 this claim:

413

414 *“...how long will be breastmilk be stored because even if we have donors and people*  
415 *don’t come for the breastmilk the milk might go waste.”* (Midwife 8)

416 *“How long can it be stored without the milk going bad? If mothers are given enough*  
417 *breastmilk to take home, can our normal refrigerator store it? If yes, at what*  
418 *temperature? Will mothers avail themselves to donate at a breastmilk bank?”*

419 (Midwife, 6)

420 Health professionals also predicted that a difficulty to the complete implementation of  
421 breastmilk banking in Ghana would be funding and the sustainability of breast banks. Some  
422 examples support this viewpoint:

423 *“I think that we do not have the resources unless we are getting the support from*  
424 *maybe international bodies. Funding can be a problem and after getting it done*  
425 *sustainability can also be a problem.”* (Midwife, 6)

426 *“Some of the challenges will be the source of funding. Looking at our current*  
427 *economy, I am wondering if this would be possible. Aside from the funding, people*  
428 *will still be worried about whether it is safe for feeding infants. Will mothers come out*  
429 *in their numbers to donate?”* (Midwife, 3)

#### 430 **Acceptance of breastmilk donor banking**

431 Health professionals who could explain the advantages to potential clients were generally in  
432 favor of the idea of breastmilk donor banking. Participants were excited about the idea of  
433 breastmilk banking and gushed about how it would help moms in their quest to feed their  
434 babies by saving them time and money. The sentiment expressed by medical professionals  
435 concerning the creation of breastmilk donor banks is exemplified by the quotes below:

436 *“I’m very excited about this. I feel is a good plan, it should come, and it should stay. I*  
437 *am positive about this- I hope it works out.”* (Midwife, 3)

438 *“I will be really excited to see it being implemented here in this hospital. As I said,*  
439 *it’s going to help a lot because there are instances where people must go outside to go*  
440 *and feed their baby. So, with this it’s going to help these mothers a lot; it will save*  
441 *money and time.”* (Nurse, 3)

442 The study's findings also demonstrated that establishing a breast milk bank in Ghana would  
443 be successful in the long run. Health professionals predicted that it wouldn't be simple to  
444 maintain it at first, but that it would eventually succeed.

445 *“It would work as long as the organizations are willing to support, and mothers are*  
446 *willing to offer themselves as point of donors it will work but it will come with its own*  
447 *resistance. Even if it doesn't work at the first trial and those gaps that made it not to*  
448 *work are fixed then with time it would work.”* (Nutritionist, 1)

449 *“It will work. Starting something is difficult but if people notice its benefit, they will*  
450 *accept it.”* (Midwife, 7)

451 *“... there are some people who will accept it and there are some who will not accept*  
452 *it. We must start and see the way forward because I believe that interventions are not*  
453 *meant for everyone because there are some people who will be in dire need of it and*  
454 *those people will accept and patronize it.”* (Midwife, 12)

455

456 When the necessity arose, health professionals expressed their willingness to donate and/or  
457 use donated breastmilk to feed their infants. Health professionals were also willing to advise  
458 individuals in need to use donated breastmilk to feed their infants when necessary and to urge  
459 moms who have extra milk to give it to a breastmilk bank. The quotes below demonstrate  
460 these ideas:

461

462 *“If I'm in the place to donate fine and if there is someone who can donate too, I think*  
463 *I will advise because if it helps another child, why not?”* (Midwife, 9)

464 *“Yes, I will. Once it's going to help the baby and the mother, I will, and I will also*  
465 *advise someone to do it.”* (Midwife, 4)

466           *“For me, at the moment I have finish giving birth so I don’t think I will have any, but*  
467           *I’m willing to advice other women or colleagues to participate if they have enough to*  
468           *give.”* (Midwife, 8)

469 While some healthcare professionals held the opinion that if they had an excess supply of  
470 breastmilk, they would donate it to a breast bank and advise women without medical  
471 conditions to do the same, others emphasized that they would only do so if the security of the  
472 breastmilk banking can be ensured.

473           *“If there are reports that the safety of it has been compromised, I wouldn’t keep*  
474           *recommending it to people. If the safety of it is compromised, then there is no point of*  
475           *buying something that is not worth the quality.”* (Nutritionist, 1)

476           *“If the donor is ill and doesn’t have the strength to donate, I will not advise; aside*  
477           *that I don’t think something will prevent me from recommending it.”* (Nurse, 3)

#### 478 **Pre-implementation preparations**

479 All of the healthcare professionals agreed that the key strategies for making this intervention  
480 successful were education and training. From the planning stage through the implementation  
481 stage, education was advised at every stage. Health professionals believed that the only way  
482 to dispel myths and misconceptions about breast milk banks was via education. Before  
483 beginning this intervention, health professionals recognized the need to educate stakeholders,  
484 moms, couples, and the general public. Stakeholders should be involved at the planning  
485 stage, according to health professionals. The following quotations serve as examples of these  
486 viewpoints:

487           *“...the public should be educated about it. It is very necessary because it’s going to*  
488           *eliminate their negative perception about it especially about the safety of it.”*  
489           (Midwife, 1)

490 *“There should be consistent education on it, through the media, opinion leaders,*  
491 *churches, the community should be involved, and this will make it easier for it to be*  
492 *implemented. The community should also be assured of the safety of the donor milk.”*

493 (Midwife, 5)

494 *“There should be qualified personnel that would be in charge of it, there should be*  
495 *intensive education to the public concerning its operation and the processes*  
496 *breastmilk would go through because it is something new.”* (Midwife, 12)

497 Health professionals also suggested ways to reward moms who agree to give breastmilk to a  
498 bank. They believed that rewards in the form of incentives could inspire or uplift the spirits of  
499 moms who have extra breast milk and want to donate it to a breastmilk bank. They viewed  
500 this drive as a tool to persuade moms with extra milk to voluntarily offer it to a breastmilk  
501 bank as a donation. The quotes below demonstrate these ideas:

502 *If the nearest donor facility is at Korle Bu and I am here at Ridge I will not pick a car*  
503 *and go so the government, WHO, UNICEF and other bodies should heavily subsidize it*  
504 *and maybe compensate mothers who donate their milk.”* (Nurse, 3)

505 *“I wouldn’t donate if I won’t be given any supplement to replace the energy I used to*  
506 *donate [laughs]. Yes, at least donors should be compensated. I think with this, mothers*  
507 *would feel encouraged to donate to a breast bank.”* (Midwife, 1)

508 Finally, health professionals underlined the need to involve stakeholders in the development  
509 of a policy to direct and regulate the nation's breast milk bank before implementation, as seen  
510 in the following example:

511 *“There is a need for stakeholders’ engagements before implementation. This would be*  
512 *an initial good step. In addition to that we need to develop a policy to guide the*

513 *process. Otherwise, you may see several people setting up breastmilk banks because fo*  
514 *monetary gains” (Medical Officer 1)*

## 515 **DISCUSSION**

516 This qualitative study looked at how well-liked breast milk donor banking is among medical  
517 professionals. The study makes it clear that some health professionals initially did not think  
518 this study was necessary because they knew little to nothing about breastmilk donor banks.  
519 Hence, there was very little initial acceptance among these health professionals; nevertheless,  
520 after being explained the basic idea behind breastmilk donor banking, the majority of the  
521 professionals displayed a favorable attitude. It sent a message that someone might dismiss an  
522 intervention if they have little or no awareness about it. Health professionals who were  
523 familiar with the practice of wet nursing also acquired a favorable perspective on the  
524 activities of breastmilk donor banking. This was due to the fact that these health professionals  
525 equated breastfeeding a newborn with the milk of a close friend or family with the practice of  
526 breastmilk donor banking. Health professionals who said they were aware of and  
527 knowledgeable with breastmilk donor banking were able to define it correctly. Colleagues  
528 and educational institutions were cited as the primary sources of information. The study  
529 found that understanding breast milk donor banking has a beneficial impact on people's  
530 acceptance of its practice. This outcome from the current study is supported by research done  
531 years earlier. A Brazilian study found that donating human milk for primary healthcare was  
532 strongly correlated with knowledge of milk expression [20]. According to a related study by  
533 Chagwena et al., having in-depth knowledge of breastmilk banks was associated with  
534 acceptance of donor human milk banking [21]. The main obstacles preventing postpartum  
535 women from donating or accepting donor milk, according to Zhang et al., are a lack of  
536 knowledge regarding breastmilk donor banks and its safety [22].

537

538 The study also revealed that health professionals believed the establishment of breastmilk  
539 banks in Ghanaian hospitals was an excellent concept and a great way for newborns who are  
540 lacking in that area to still benefit from breastmilk. According to the study, feeding needy  
541 children donor breastmilk will lower infant mortality and morbidity because the babies will  
542 have ready access to food, reducing the risk of infections. It was believed that giving a needy  
543 baby breastmilk from a bank would enhance the percentage of exclusive breastfeeding, hence  
544 preventing disease and mortality, because health practitioners emphasized how healthy  
545 breastmilk is. According to the study, health professionals believe that obtaining breastmilk  
546 from a bank is preferable than using infant formula because the latter exposes babies to  
547 diseases when it is not produced hygienically. Yet, it was found that moms who couldn't  
548 afford to buy breastmilk from a breastmilk bank would choose to buy infant formula instead  
549 if the price of doing so rose.

550 The responders emphasized multiple times the importance of breastmilk for a baby's growth  
551 and development, and by implication, the importance of donated breastmilk. The impact of  
552 mothers' milk on preterm infants' neurodevelopment was previously demonstrated in a study  
553 conducted in the United States [23]. An associated British study found that donor breastmilk  
554 is better accepted and less likely to result in necrotizing enterocolitis in premature neonates  
555 [23]. Yet, different worries and opinions on the security of breastmilk from a bank were  
556 voiced. The main perceived barrier to the acceptance of breastmilk donor banking among  
557 health professionals was the fear of contagious illnesses. There were rumors that an HIV-  
558 positive mother could be mistaken for a donor who had tested negative, which could  
559 ultimately have an impact on safety of breastmilk.

560

561 So, one of the most important tools in eradicating the worry that babies may catch diseases or  
562 infections was trust in the breastmilk banking system. In a research to investigate the  
563 acceptability of donated breast milk in a resource-constrained South African setting, lack of  
564 trust in HIV testing as well as healthcare providers and employees was raised, and this may  
565 alter attitudes toward breast milk donation [24]. In this study, misconceptions about the  
566 difficulty of feeding infants with donated breastmilk were also noted, including the  
567 transmission of infections and the transmission of inherited features or character. Thus, these  
568 medical professionals advocated the usage of infant formulae over the strategy of donor  
569 breastmilk banking. It was discovered that wet breastfeeding, which was practiced in the past,  
570 is no longer a popular practice due to concern over illnesses like HIV. Because of false  
571 beliefs regarding the safety of breastmilk, a comparable study carried out in Ethiopia by  
572 Gelano et al. revealed that the acceptance of breast milk donor banks and its use for feeding  
573 newborns was relatively low[2].

574 Earlier research also demonstrated that, despite some people's belief that donor breastmilk  
575 was safe and that treating it might get rid of HIV and disease-causing organisms, the donor  
576 milk's safety posed a significant barrier. Using the milk of another mother causes discomfort  
577 and raises concerns regarding the safety of donor breast milk, according to a study done in  
578 South Africa by Coutsooudis et al. [24]. Despite this, a small number of the health  
579 professionals interviewed were certain that donor screening and breastmilk treatment could  
580 completely prevent milk storage contamination.

581

582 Results also showed that people's reluctance to give breastmilk or accept its use for newborn  
583 feeding instead of choosing formula was significantly influenced by religious groups' or  
584 churches' activities. Some medical specialists believed that breastmilk donor banks would be

585 frowned upon by various religious groups and churches. Hence, it was assumed that the  
586 behavior would appear improper to members of such churches. In a related study carried out  
587 in Ethiopia by Gelano et al., it was also discovered that mothers' reluctance to contribute to a  
588 breastmilk bank was partly motivated by their religious beliefs [2]. Notwithstanding the  
589 expected difficulties in implementing breastmilk banks in our hospitals, it was determined  
590 that the advantages of doing so would outweigh the difficulties. The study's findings also  
591 demonstrated that cultural contexts or conventions did not truly provide a barrier to using  
592 donated breastmilk to feed newborns. This resulted from the fact that wet nursing is currently  
593 practiced in most cultures or previously was. This calls for stakeholder involvement prior to  
594 the policy's implementation in Ghana.

595  
596 Health professionals praised the value of depositing breastmilk donors and indicated their  
597 pleasure and approval with how breastmilk banks operate. The results demonstrate that health  
598 professionals were prepared to use donated breastmilk when necessary and were also  
599 prepared to suggest it to families in need due to the significance connected to it. For the most  
600 part, respondents said they would be comfortable delivering or recommending it. The desire  
601 to assist newborns in need served as the main driving force behind breastmilk donation. The  
602 acceptance of the intervention was also aided by health personnel' comprehension of the  
603 procedure and the issues the intervention typically resolves. It was clear that the safety of  
604 breastmilk donor banking and the understanding of health professionals were key factors in  
605 its acceptance. Breast milk donor banking was observed to be acceptable among medical  
606 professionals in a comparable study conducted in Zimbabwe [21]. It was discovered that  
607 some health professionals 31% said they would give their child donated breastmilk, while the  
608 bulk of professionals 56% agreed to advise their customers to donate breastmilk to a bank.  
609 Mothers expressed support and desire to give their breastmilk to breastmilk banks in a

610 different study conducted in South Australia, providing the process is simple and quick[24].  
611 Also, studies showed that moms of newborns who were premature or sickly would use a  
612 human milk bank if they were confident the milk was suitable and secure for their kids. To  
613 combat the false beliefs people have about safety, education is a vital tool. This  
614 recommendation was in line with a number of studies that were done on people's desire to use  
615 breastmilk from a breastmilk bank and their willingness to contribute breastmilk to one.  
616 Public education on breastmilk banks is required, according to a study by Zhang et al. [22]. It  
617 came to the conclusion that information should be shared in the early stages of its  
618 establishment. Thus, efforts should be made to improve mothers' awareness of the benefits of  
619 breastmilk and nursing.

## 620 **Conclusions**

621 Before the study, health professionals had little knowledge about the banking of  
622 breastmilk. There were misconceptions regarding its safety, with the biggest  
623 obstacle that can affect acceptability being the fear of contracting HIV. Despite  
624 this, medical professionals were upbeat and optimistic about the importance of  
625 breastmilk banking and its effectiveness in reducing infant mortality and  
626 morbidity. When necessary, health professionals were willing to create  
627 awareness campaigns about breastmilk banking, give or use recipient families'  
628 donated breastmilk, and convince other families to do the same. The safety of  
629 breastmilk donor banking must be made known to women, parents, and the  
630 general public in order for it to be successfully implemented. Thus, breastmilk  
631 donor banking was acknowledged by healthcare professionals at Greater Accra  
632 Regional Hospital.

633 **Declarations**

634 **Acknowledgments**

635 The authors wish to thank all the study participants who shared their views with the study.  
636 team on the topic.

637 **References**

- 638 1. WHO. Breastfeeding. 2021 [cited 20 Dec 2022]. Available:  
639 [https://www.who.int/health-topics/breastfeeding#tab=tab\\_1](https://www.who.int/health-topics/breastfeeding#tab=tab_1)
- 640 2. Gelano TF, Bacha YD, Assefa N, Motumma A, Roba AA, Ayele Y, et al.  
641 Acceptability of donor breast milk banking, its use for feeding infants, and associated  
642 factors among mothers in eastern Ethiopia. *Int Breastfeed J.* 2018;13: 1–10.  
643 doi:10.1186/s13006-018-0163-z
- 644 3. Beevi S SS, Shanu A, Geethan A, Suryan A, Kumar A, Kumar B, et al. Assessment of  
645 Knowledge regarding Human Breast Milk Bank among the Nursing Officers in  
646 JIPMER Puducherry. *Medicon Med Sci.* 2021;1: 13–20.
- 647 4. Ickes SB, Sanders H, Denno DM, Myhre JA, Kinyua J, Singa B, et al. Exclusive  
648 breastfeeding among working mothers in Kenya: Perspectives from women, families  
649 and employers. *Matern Child Nutr.* 2021;17: 1–14. doi:10.1111/mcn.13194
- 650 5. Appiah PK, Amu H, Osei E, Konlan KD, Mumuni IH, Verner ON, et al. Breastfeeding  
651 and weaning practices among mothers in Ghana: A population-based cross-sectional  
652 study. *PLoS One.* 2021;16: 1–19. doi:10.1371/journal.pone.0259442
- 653 6. UNICEF Ghana. Country profile: Key demographic indicators. 2019. Available:  
654 <https://data.unicef.org/country/gha/>

- 655 7. Hoodbhoy S. Human milk banking; current evidence and future challenges. *Paediatr*  
656 *Child Heal (United Kingdom)*. 2013;23: 337–341. doi:10.1016/j.paed.2013.04.001
- 657 8. Steele S, Martyn J, Foell J. Risks of the unregulated market in human breast milk.  
658 *BMJ Open*. 2015.
- 659 9. Blanchard E, Zhu P, Schuck P. Infant formula powders. In: Bhandari B, Bansal N,  
660 Zhang M, Schuck P, editors. *Handbook of Food Powders: Processes and Properties*.  
661 UK: Woodhead Publishing Series in Food Science,; 2013.
- 662 10. Kair LR, Flaherman VJ, Colaizy TT. Effect of Donor Milk Supplementation on  
663 Breastfeeding Outcomes in Term Newborns: A Randomized Controlled Trial. *Clin*  
664 *Pediatr (Phila)*. 2019;58: 534–540. doi:10.1177/0009922819826105
- 665 11. Gutierrez Dos Santos B, Perrin MT. What is known about human milk bank donors  
666 around the world: A systematic scoping review. *Public Health Nutr*. 2022;25: 312–  
667 322. doi:10.1017/S1368980021003979
- 668 12. National Institute for Health and Clinical Excellence. *Donor Breast Milk Banks: The*  
669 *Operation of Donor Milk Bank Services*. UK; 2010.
- 670 13. Obeng C, Jackson F, Nsiah-asamoah C, Amisah-essel S, Obeng-gyasi B, Perry CA, et  
671 al. Human Milk for Vulnerable Infants : Breastfeeding and Milk Sharing Practice  
672 among Ghanaian Women. *Int J Environ Res Public Health*. 2022;19.
- 673 14. Creswell JW. *Research design: Qualitative, quantitative, and mixed methods*  
674 *approaches*. *Res Des Qual Quant Mix methods approaches*. 2009;3rd: 260.
- 675 15. Bowling A. *Research Methods in Health: Investigating Health and Health Service*. 4th  
676 Ed. England: Open University Press; 2014.
- 677 16. Sekhon M, Cartwright M, Francis JJ. Acceptability of healthcare interventions: An

- 678 overview of reviews and development of a theoretical framework. *BMC Health Serv*  
679 *Res.* 2017;17: 1–13. doi:10.1186/s12913-017-2031-8
- 680 17. Birt L, Scott S, Cavers D, Campbell C, Walter F. Member Checking: A Tool to  
681 Enhance Trustworthiness or Merely a Nod to Validation? *Qual Health Res.* 2016;26:  
682 1802–1811. doi:10.1177/1049732316654870
- 683 18. Tabong PT-N, Bawontuo V, Dumah DN, Kyilleh JM, Yempabe T. Premorbid risk  
684 perception, lifestyle, adherence and coping strategies of people with diabetes mellitus:  
685 A phenomenological study in the Brong Ahafo Region of Ghana. *PLoS One.* 2018;13:  
686 e0198915. doi:10.1371/journal.pone.0198915
- 687 19. Fereday J, Muir-Cochrane E. Demonstrating Rigor Using Thematic Analysis: A  
688 Hybrid Approach of Inductive and Deductive Coding and Theme Development. *Int J*  
689 *Qual Methods.* 2006;5: 80–92. doi:doi.org/10.1177/160940690600500107
- 690 20. Chagwena DT, Mugariri F, Sithole B, Mataga SF, Danda R, Matsungo TM, et al.  
691 Acceptability of donor breastmilk banking among health workers: A cross-sectional  
692 survey in Zimbabwean urban settings. *Int Breastfeed J.* 2020;15: 1–11.  
693 doi:10.1186/s13006-020-00283-y
- 694 21. Zhang N, Li JY, Liu XW, Jiang YL, Redding SR, Ouyang YQ. Factors associated with  
695 postpartum women’s knowledge, attitude and practice regarding human milk banks  
696 and milk donation: A cross-sectional survey. *Midwifery.* 2020;91.
- 697 22. Brown JVE, Walsh V, McGuire W. Formula versus maternal breast milk for feeding  
698 preterm or low birth weight infants. *Cochrane Database Syst Rev.* 2019;2019.  
699 doi:10.1002/14651858.CD002972.pub3
- 700 23. Coutsoydis I, Petrites A, Coutsoydis A. Acceptability of donated breast milk in a

701 resource limited South African setting. *Int Breastfeed J.* 2011;6: 1–10.  
702 doi:10.1186/1746-4358-6-3

703 24. Mackenzie C, Javanparast S, Newman L. Mothers’ knowledge of and attitudes toward  
704 human milk banking in South Australia: A qualitative study. *J Hum Lact.* 2013;29:  
705 222–229. doi:10.1177/0890334413481106

706
